# Supplementary material for: Differing impact of phosphoglycerate mutase 1-deficiency on brown and white adipose tissue
Source: PubMed Central journal article supplement (PMC9065309; doi:10.1016/j.isci.2022.104268), 2022-04-18
Supplement: mmc1.pdf [file mmc1.pdf]

## **Supplemental information**

### **Differing impact of phosphoglycerate mutase**

#### **1-deficiency on brown and white adipose tissue**

**Yohko Yoshida, Ippei Shimizu, Yung-Ting Hsiao, Masayoshi Suda, Goro Katsuumi, Masahide Seki, Yutaka Suzuki, Shujiro Okuda, Tomoyoshi Soga, and Tohru Minamino**

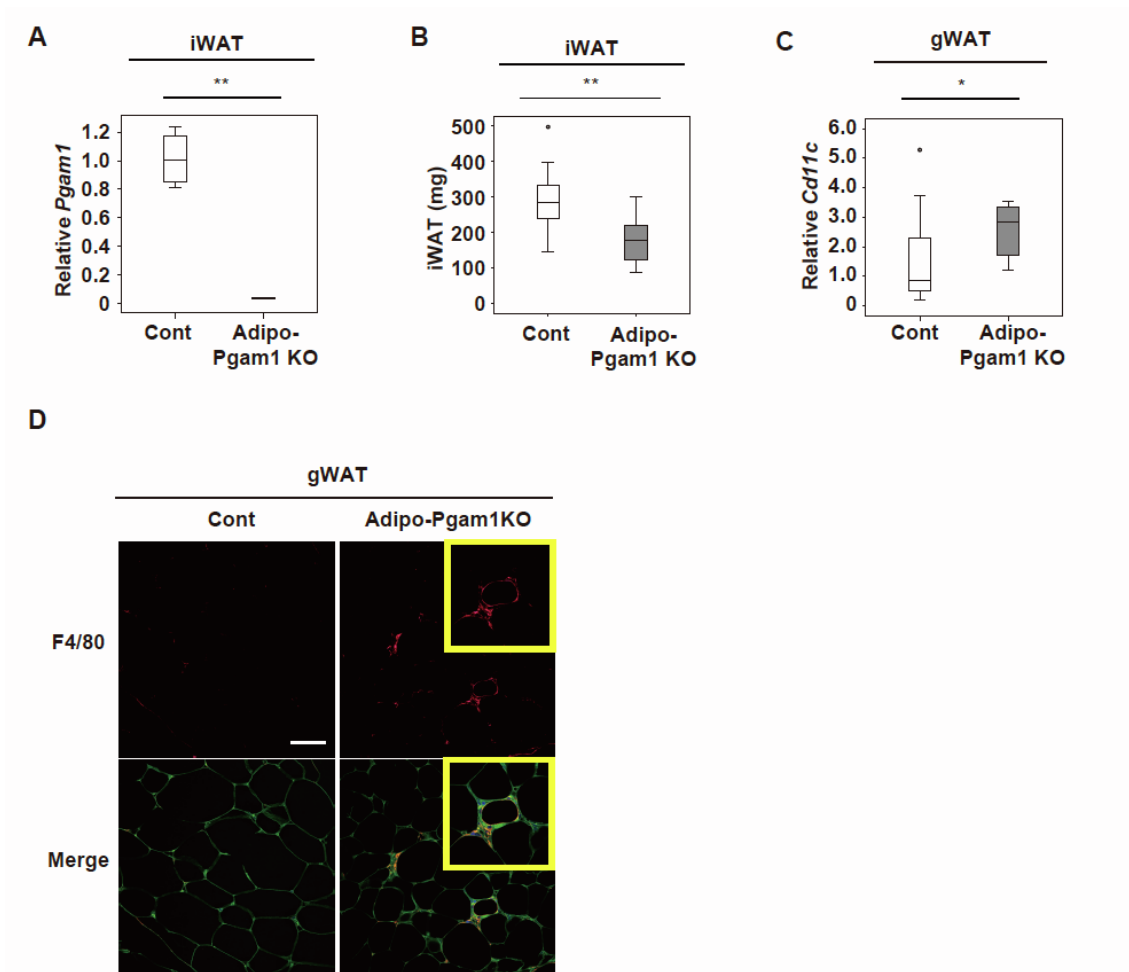

**Figure S1 Adipose tissue-specific *Pgam1* deletion has differing effects on BAT and WAT, Related to Figure 1**

(A) Transcripts for *Pgam1* of inguinal WAT (iWAT) from Adipo-*Pgam1* knockout (Adipo-*Pgam1* KO) and their littermate WT (Cont) mice (n=4, 4). (B) iWAT weight of mice prepared in Supplemental Fig. 1A (n=18, 16). (C) Transcripts for *Cd11c* of gonadal WAT (gWAT) from Adipo-*Pgam1* knockout (Adipo-*Pgam1* KO) and their littermate WT (Cont) mice (n=14, 9). (D) Immunostaining for F4/80 in gonadal WAT (gWAT) from Adipo-*Pgam1* knockout (Adipo-*Pgam1* KO) and their littermate WT (Cont) mice. Scale bar=50 $\mu$ m. Data were analyzed by the 2-tailed Student's t-test (A–C). \*P<0.05, \*\*P<0.01. Values represent the mean  $\pm$  s.e.m. NS = not significant.

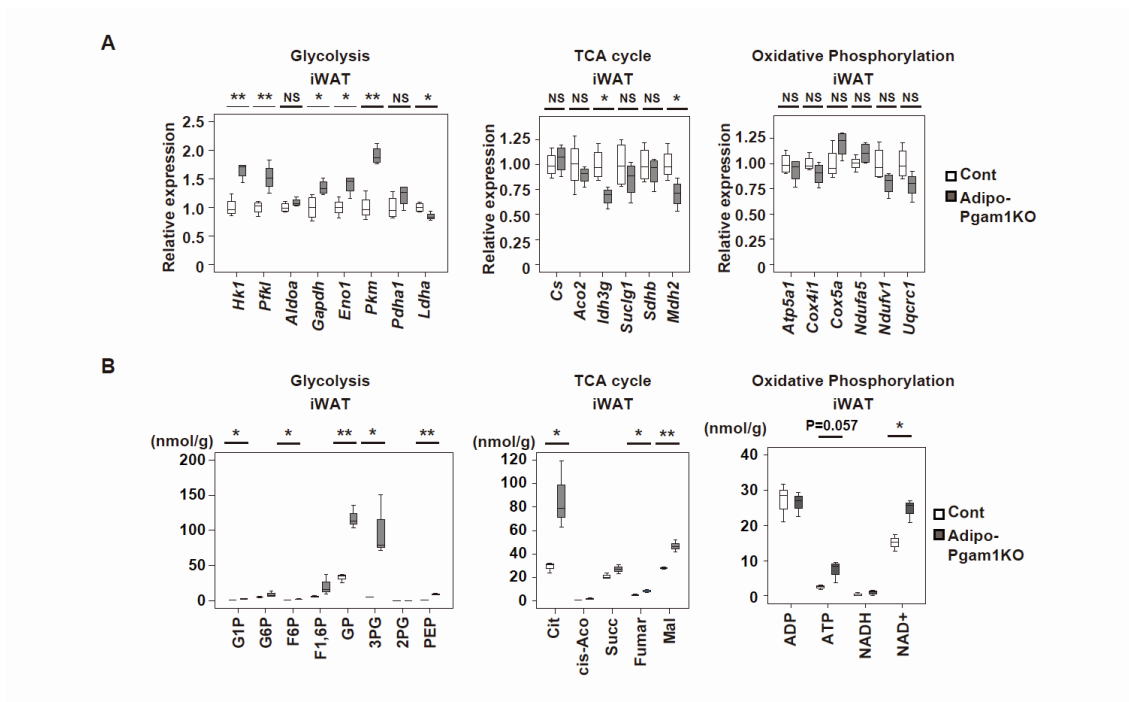

**Figure S2 Opposing metabolic profiles of BAT and WAT in Adipo-Pgam1 KO mice, Related to Figure 2**

(A) Transcripts for enzymes related to glycolysis, TCA cycle and oxidative phosphorylation of inguinal WAT (iWAT) from Adipo-Pgam1 knockout (Adipo-Pgam1 KO) and their littermate WT (Cont) mice (n=4,4). (B) Tissue weight-adjusted metabolite level in glycolysis, TCA cycle and oxidative phosphorylation in iWAT from mice prepared in Supplemental Fig. 2A (each n=3, 3). Data were analyzed by the 2-tailed Student's t-test (A, B). \*P<0.05, \*\*P<0.01. Values represent the mean  $\pm$  s.e.m. NS = not significant.

| BAT                       |                                             |         |           | gWAT                    |                                             |                                            |           |         |           |
|---------------------------|---------------------------------------------|---------|-----------|-------------------------|---------------------------------------------|--------------------------------------------|-----------|---------|-----------|
|                           | P-value                                     | Q-value | Direction |                         | P-value                                     | Q-value                                    | Direction |         |           |
| Up-regulated genes        | Phagosome                                   | 0.000   | 0.000     | 2.898                   | Oxidative phosphorylation                   | 0.000                                      | 0.000     | 4.766   |           |
|                           | NF-kappa B signaling pathway                | 0.000   | 0.000     | 3.124                   | Citrate cycle (TCA cycle)                   | 0.000                                      | 0.000     | 6.724   |           |
|                           | Focal adhesion                              | 0.000   | 0.000     | 2.333                   | Biosynthesis of amino acids                 | 0.000                                      | 0.000     | 4.125   |           |
|                           | Ribosome                                    | 0.000   | 0.000     | 2.547                   | Ribosome                                    | 0.000                                      | 0.000     | 2.831   |           |
|                           | Protein processing in endoplasmic reticulum | 0.000   | 0.000     | 2.395                   | Aminoacyl-tRNA                              | 0.000                                      | 0.000     | 3.530   |           |
|                           | Regulation of actin cytoskeleton            | 0.000   | 0.000     | 2.127                   | Lysosome                                    | 0.000                                      | 0.000     | 2.706   |           |
|                           | ECM-receptor interaction                    | 0.000   | 0.000     | 2.582                   | Glycolysis /                                | 0.000                                      | 0.000     | 3.362   |           |
|                           | Cell adhesion molecules (CAMs)              | 0.000   | 0.000     | 2.086                   | Amino sugar and nucleotide sugar metabolism | 0.000                                      | 0.000     | 3.698   |           |
|                           | Apoptosis                                   | 0.000   | 0.000     | 2.598                   | Fatty acid elongation                       | 0.000                                      | 0.001     | 5.085   |           |
|                           | Amino sugar and nucleotide sugar metabolism | 0.000   | 0.000     | 3.107                   | Pentose phosphate                           | 0.000                                      | 0.001     | 4.438   |           |
|                           | TNF signaling pathway                       | 0.000   | 0.000     | 2.280                   | Purine metabolism                           | 0.000                                      | 0.001     | 2.168   |           |
|                           | DNA replication                             | 0.000   | 0.001     | 3.353                   | HIF-1 signaling pathway                     | 0.000                                      | 0.001     | 2.499   |           |
|                           | Ribosome biogenesis in eukaryotes           | 0.000   | 0.001     | 2.455                   | Pyruvate metabolism                         | 0.000                                      | 0.001     | 3.530   |           |
|                           | Cell cycle                                  | 0.000   | 0.001     | 2.085                   | Fatty acid metabolism                       | 0.000                                      | 0.001     | 3.328   |           |
|                           | Adherens junction                           | 0.002   | 0.005     | 2.207                   | Protein processing in endoplasmic reticulum | 0.000                                      | 0.002     | 2.101   |           |
|                           | p53 signaling pathway                       | 0.002   | 0.005     | 2.297                   | SNARE interactions in transport             | 0.002                                      | 0.011     | 3.362   |           |
|                           | Sphingolipid metabolism                     | 0.006   | 0.015     | 2.367                   | DNA replication                             | 0.004                                      | 0.018     | 3.082   |           |
|                           | N-Glycan biosynthesis                       | 0.013   | 0.028     | 2.130                   | Basal transcription factors                 | 0.005                                      | 0.021     | 2.774   |           |
|                           | Non-homologous end-joining                  | 0.023   | 0.043     | 3.277                   | RNA degradation                             | 0.012                                      | 0.046     | 2.161   |           |
|                           | Other glycan degradation                    | 0.028   | 0.050     | 2.762                   | Cell cycle                                  | 0.015                                      | 0.053     | 1.849   |           |
| One carbon pool by folate | 0.034                                       | 0.058   | 2.616     | Apoptosis               | 0.016                                       | 0.053                                      | 2.029     |         |           |
| Down-regulated genes      |                                             | P-value | Q-value   | Direction               | Proteasome                                  | 0.022                                      | 0.071     | 2.465   |           |
|                           | Oxidative phosphorylation                   | 0.000   | 0.000     | 3.793                   | Nucleotide excision repair                  | 0.022                                      | 0.071     | 2.465   |           |
|                           | Peroxisome                                  | 0.000   | 0.000     | 3.730                   | Ribosome biogenesis in eukaryotes           | 0.037                                      | 0.100     | 1.917   |           |
|                           | Valine, leucine and isoleucine degradation  | 0.000   | 0.000     | 3.545                   | p53 signaling pathway                       | 0.039                                      | 0.105     | 1.958   |           |
|                           | Proteasome                                  | 0.000   | 0.000     | 3.414                   | VEGF signaling pathway                      | 0.047                                      | 0.118     | 2.034   |           |
|                           | Citrate cycle (TCA cycle)                   | 0.000   | 0.000     | 3.879                   | mTOR signaling pathway                      | 0.082                                      | 0.166     | 1.819   |           |
|                           | Propanoate metabolism                       | 0.000   | 0.000     | 3.964                   | Down-regulated genes                        |                                            | P-value   | Q-value | Direction |
|                           | Fatty acid metabolism                       | 0.000   | 0.000     | 3.175                   |                                             | Valine, leucine and isoleucine degradation | 0.001     | 0.056   | 3.447     |
|                           | Pyruvate metabolism                         | 0.000   | 0.000     | 3.142                   |                                             | Propanoate metabolism                      | 0.009     | 0.164   | 3.373     |
|                           | Fatty acid degradation                      | 0.000   | 0.000     | 2.880                   |                                             | Lysine degradation                         | 0.030     | 0.313   | 2.343     |
|                           | Glyoxylate and dicarboxylate metabolism     | 0.000   | 0.001     | 3.348                   |                                             | Inositol phosphate metabolism              | 0.041     | 0.356   | 2.204     |
|                           | Fatty acid elongation                       | 0.000   | 0.002     | 3.414                   |                                             | Ras signaling pathway                      | 0.003     | 0.110   | 1.900     |
|                           | Glycolysis / Gluconeogenesis                | 0.001   | 0.004     | 2.250                   |                                             | Phosphatidylinositol signaling system      | 0.016     | 0.224   | 2.213     |
|                           | Sulfur relay system                         | 0.005   | 0.020     | 4.096                   |                                             | FoxO signaling pathway                     | 0.018     | 0.224   | 1.881     |
|                           | SNARE interactions in vesicular transport   | 0.018   | 0.057     | 2.172                   |                                             | ABC transporters                           | 0.019     | 0.224   | 2.598     |
|                           |                                             |         |           | HIF-1 signaling pathway |                                             | 0.038                                      | 0.356     | 1.884   |           |
|                           |                                             |         |           | Adherens junction       |                                             | 0.003                                      | 0.110     | 2.624   |           |

**Figure S3 Transcriptomic analysis of Adipo-Pgam1 KO mice, Related to Figure 2**  
The results of enrichment analysis for genes in microarray analysis in BAT (left) and gWAT (right).

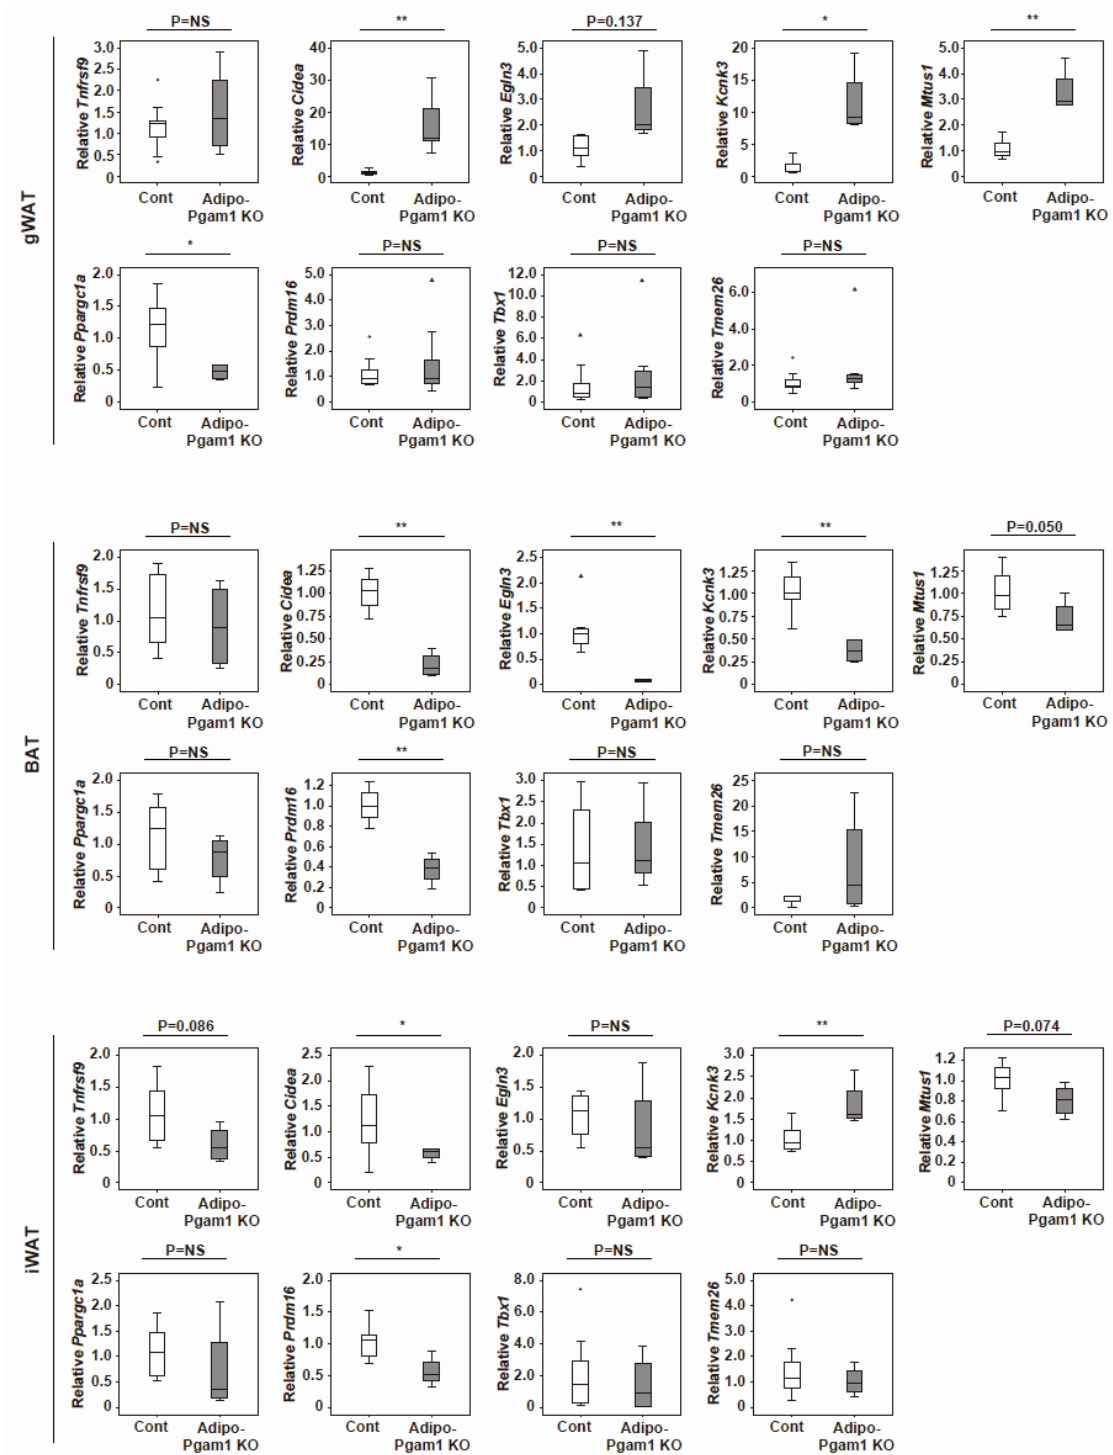

**Figure S4 Expression of beige makers in Adipo-Pgam1 KO mice, Related to Figure 3**

Transcripts for beige makers in gWAT, BAT, and iWAT from Adipo-Pgam1 KO mice and their littermate WT (Cont) mice (gWAT; n=14,9 for *Tnfrsf9*, *Cidea*, *Prdm16*, *Tbx1* and *Tmem26*, n=8,4 for *Egn3*, *Kcnk3*, *Mtus1* and *Ppargc1a*, BAT; n=8,4, iWAT; n=8,4). Data were analyzed by the 2-tailed Student's t-test. \*P<0.05, \*\*P<0.01. Values represent the mean  $\pm$  s.e.m. NS = not significant.

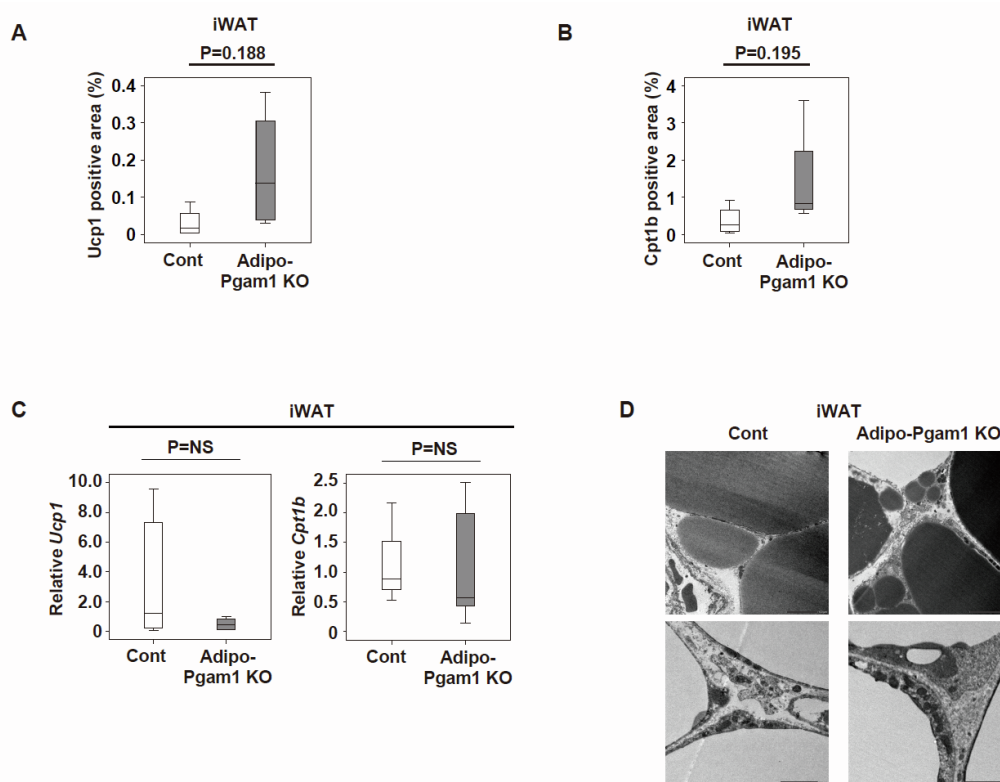

**Figure S5 Metabolic profiles of iWAT in Adipo-Pgam1 KO mice, Related to Figure 3, Related to Figure 3**

(A) The quantification of Ucp1 positive area (%) in immunofluorescent staining showing Ucp1 in iWAT from Adipo-Pgam1 KO and their littermate WT (Cont) mice (each n=4,4). (B) The quantification of Cpt1b positive area (%) in immunofluorescent staining showing Cpt1b in iWAT from mice prepared in Supplemental Figure 5A (each n=4,4). (C) Transcripts for *Ucp1* and *Cpt1b* of iWAT from mice prepared in Supplemental Figure 5A (*Ucp1* n=8, 4, *Cpt1b* n=3, 5). (D) Transmission electron microscopy analyzing iWAT from mice prepared in Supplemental Figure 5A. Scale bar=5 $\mu$ m for low magnification (upper panels) and 2 $\mu$ m for high magnification (lower panels). Data were analyzed by the 2-tailed Student's t-test (A–C). \*P<0.05, \*\*P<0.01. Values represent the mean  $\pm$  s.e.m. NS = not significant.

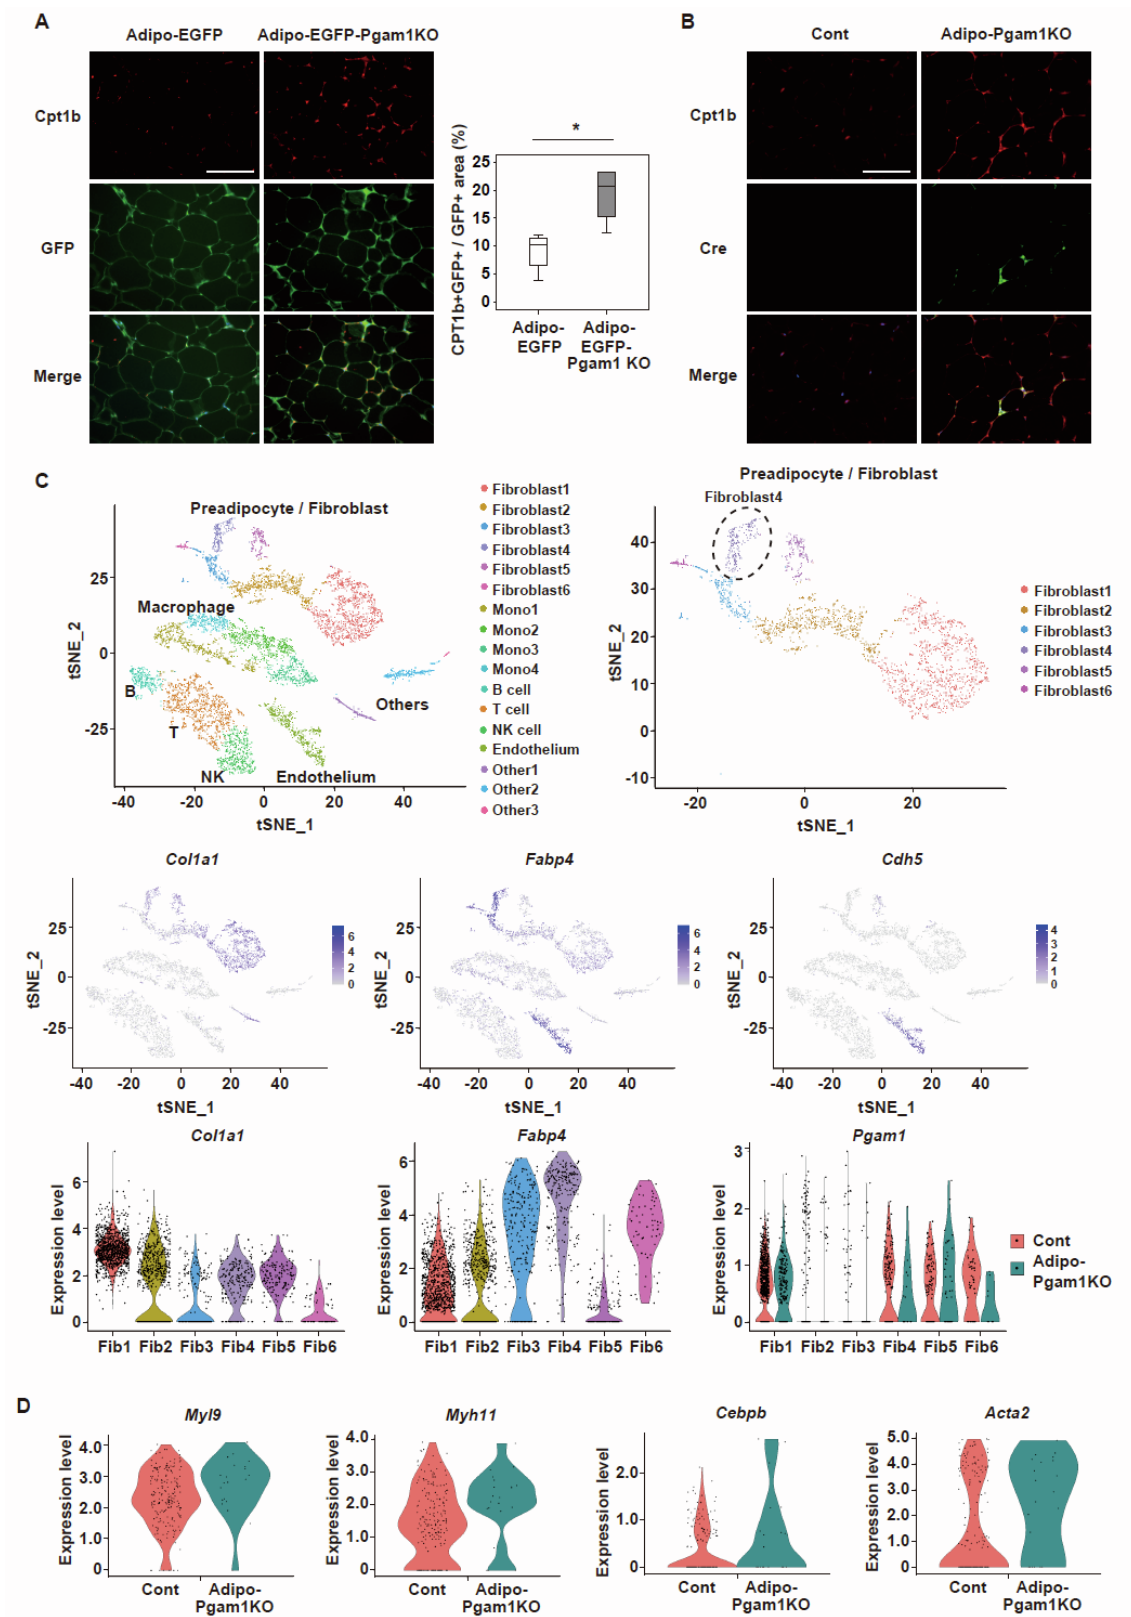

**Figure S6 Pgam1 deletion induces beiging of gWAT via cell-autonomous mechanisms, Related to Figure 3**

(A) Immunofluorescent staining showing Cpt1b (red) in gWAT from Adipo-EGFP and

Adipo-EGFP-Pgam1 KO mice. Scale bar=100  $\mu$ m. The graphs on the right display the Cpt1b/EGFP double positive area (%) (each n=4,4). (B) Immunofluorescent staining showing Cpt1b (red) and Cre recombinase (green) in gWAT from Adipo-Pgam1 KO and their littermate control mice. Scale bar=100  $\mu$ m. (C) Upper panels; Clustering of scRNA-seq analysis using gWAT from Adipo-Pgam1 KO and their littermate control mice. Middle panels; tSNE plot of scRNA-seq in gWAT from Adipo-Pgam1 KO and their littermate control mice. Lower panels; Feature plot of fibroblast and preadipocytes clusters showing *Pgam1* positive cells. (D) The violin plots showing beiging-related differential expressed genes (DEG) in the Fibroblast4 cluster. Data were analyzed by the 2-tailed Student's t-test (A, C and D). \*P<0.05, \*\*P<0.01. Values represent the mean  $\pm$  s.e.m. NS = not significant.



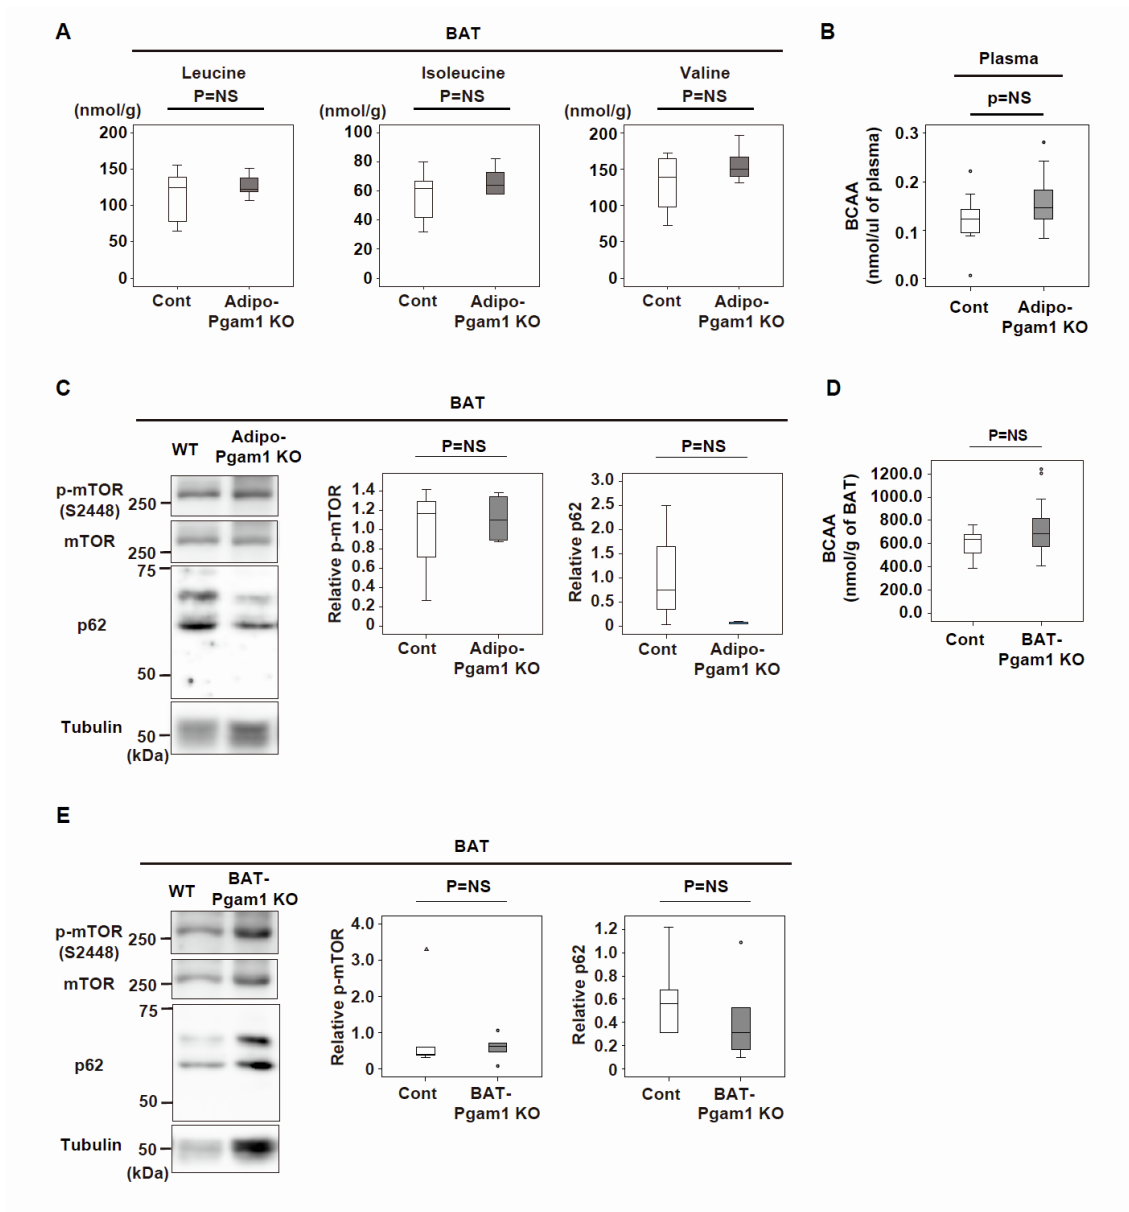

**Figure S7 Effects of Pgam1 deletion on BAT, Related to Figure 6**

(A) BCAA level in BAT from Adipo-Pgam1 KO and their littermate WT (Cont) mice (n=5, 5). (B) Plasma BCAA level in Adipo-Pgam1 KO and their littermate WT (Cont) mice (n=10, 10). (C) Western blot analysis for mTOR and p62 in BAT prepared in Supplemental Figure 7A (n=4, 4). (D) BCAA level in BAT from BAT-Pgam1 KO and their littermate WT (Cont) mice (n=17, 21). (E) Western blot analysis for mTOR and p62 in BAT prepared in Supplemental Figure 7D (n=5, 5). Data were analyzed by the 2-tailed Student's t-test (A–E). \*P<0.05, \*\*P<0.01. Values represent the mean  $\pm$  s.e.m. NS = not significant.

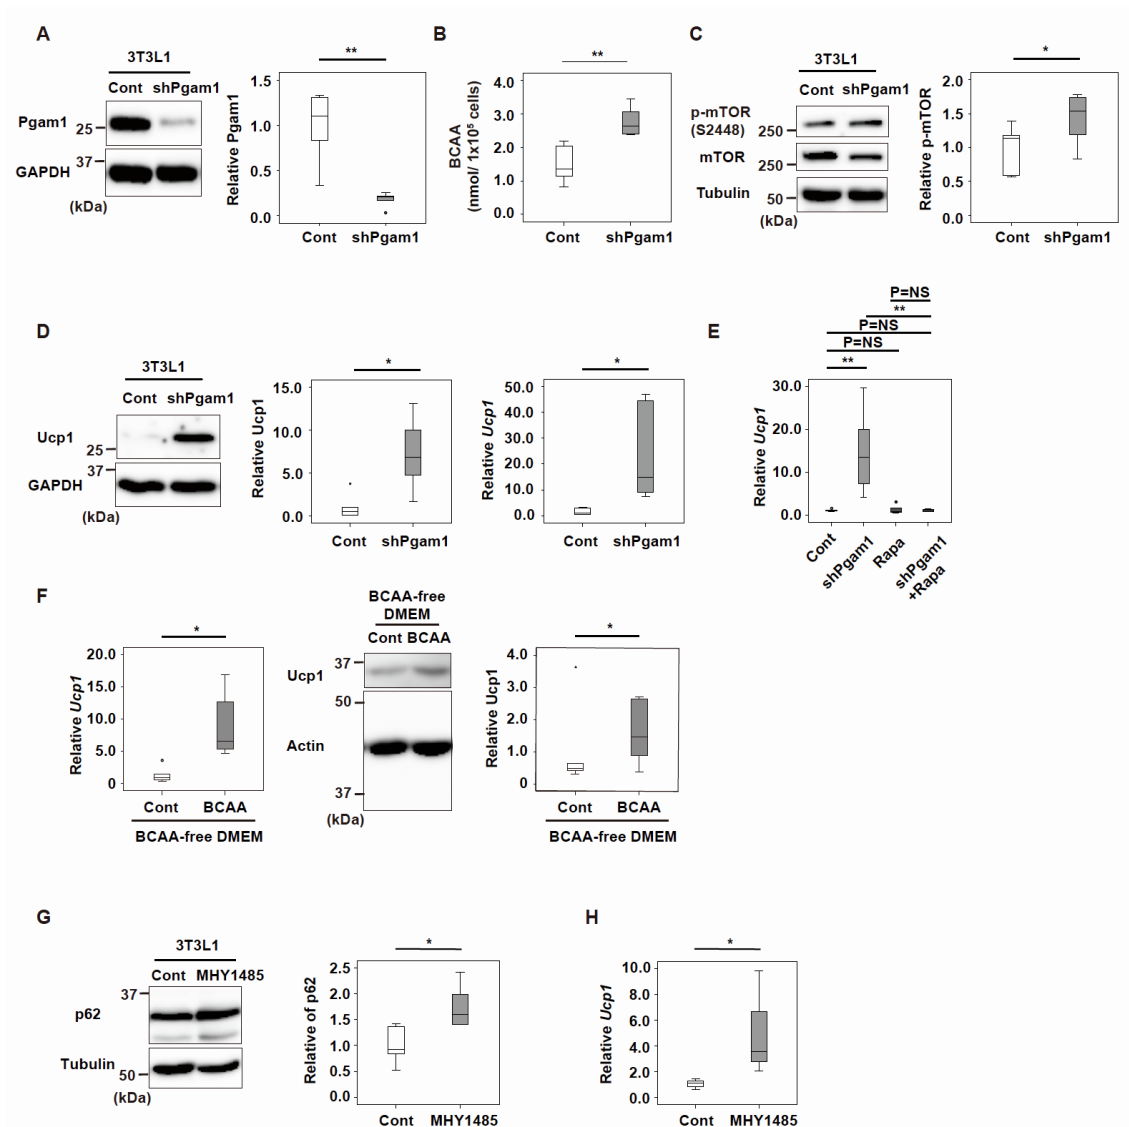

**Figure S8 Effects of Pgam1 deletion on differentiated 3T3-L1 cells, Related to Figure 6**

(A) Western blot analysis for Pgam1 in differentiated 3T3-L1 cells infected AAV-shPgam1 (shPgam1) or AAV-Control (Cont). GAPDH was used as loading control. Right graphs show the quantification of Pgam1 expression (n=6,6). (B) The quantification of branched amino acids (BCAA) in cells prepared in Supplemental Figure 8A (n=3,3). (C) Western blot analysis for mTOR in cells prepared in Supplemental Figure 8A. Tubulin was used as loading control. Right graphs show the quantification of p-mTOR level (n=6,6). (D) Western blot analysis for Ucp1 in cells prepared in Supplemental Figure 8A. GAPDH was used as loading control. Right graphs show the quantification of Ucp1 expression (n=6,6). (E) Transcripts for *Ucp1* of differentiated 3T3-L1 cells infected AAV-Control (Cont) or AAV-shPgam1 (shPgam1) pre-treated with or without 1  $\mu$ M of Rapamycin. (n=6,6,6,6). (F) Expression of Ucp1 by differentiated 3T3-L1 cells treated with or without BCAA (the mixture of 5 $\mu$ M Leucine and 2.5 $\mu$ M Isoleucine and 5 $\mu$ M

Valine) (n=6,6). BCAA-free DMEM was used in this experiment. (G) Western blot analysis for p62 in differentiated 3T3-L1 cells treated with or without 2  $\mu$ M of mTOR activator (MHY1485). Actin was used as loading control. Right graphs show the quantification of p62 expression (n=6,6). (H) Transcripts for *Ucp1* of cells prepared in Supplemental Figure 8G (n=3,3). Data were analyzed by the 2-tailed Student's t-test (A–H). \*P<0.05, \*\*P<0.01. Values represent the mean  $\pm$  s.e.m. NS = not significant.
